# Supplementary material for: Exploring the Nature of the Antimicrobial Metabolites Produced by Paenibacillus ehimensis Soil Isolate MZ921932 Using a Metagenomic Nanopore Sequencing Coupled with LC-Mass Analysis
Source: MDPI journal article supplement (doi:10.3390/antibiotics11010012), 2021-12-22
Supplement: s1 [file s1]

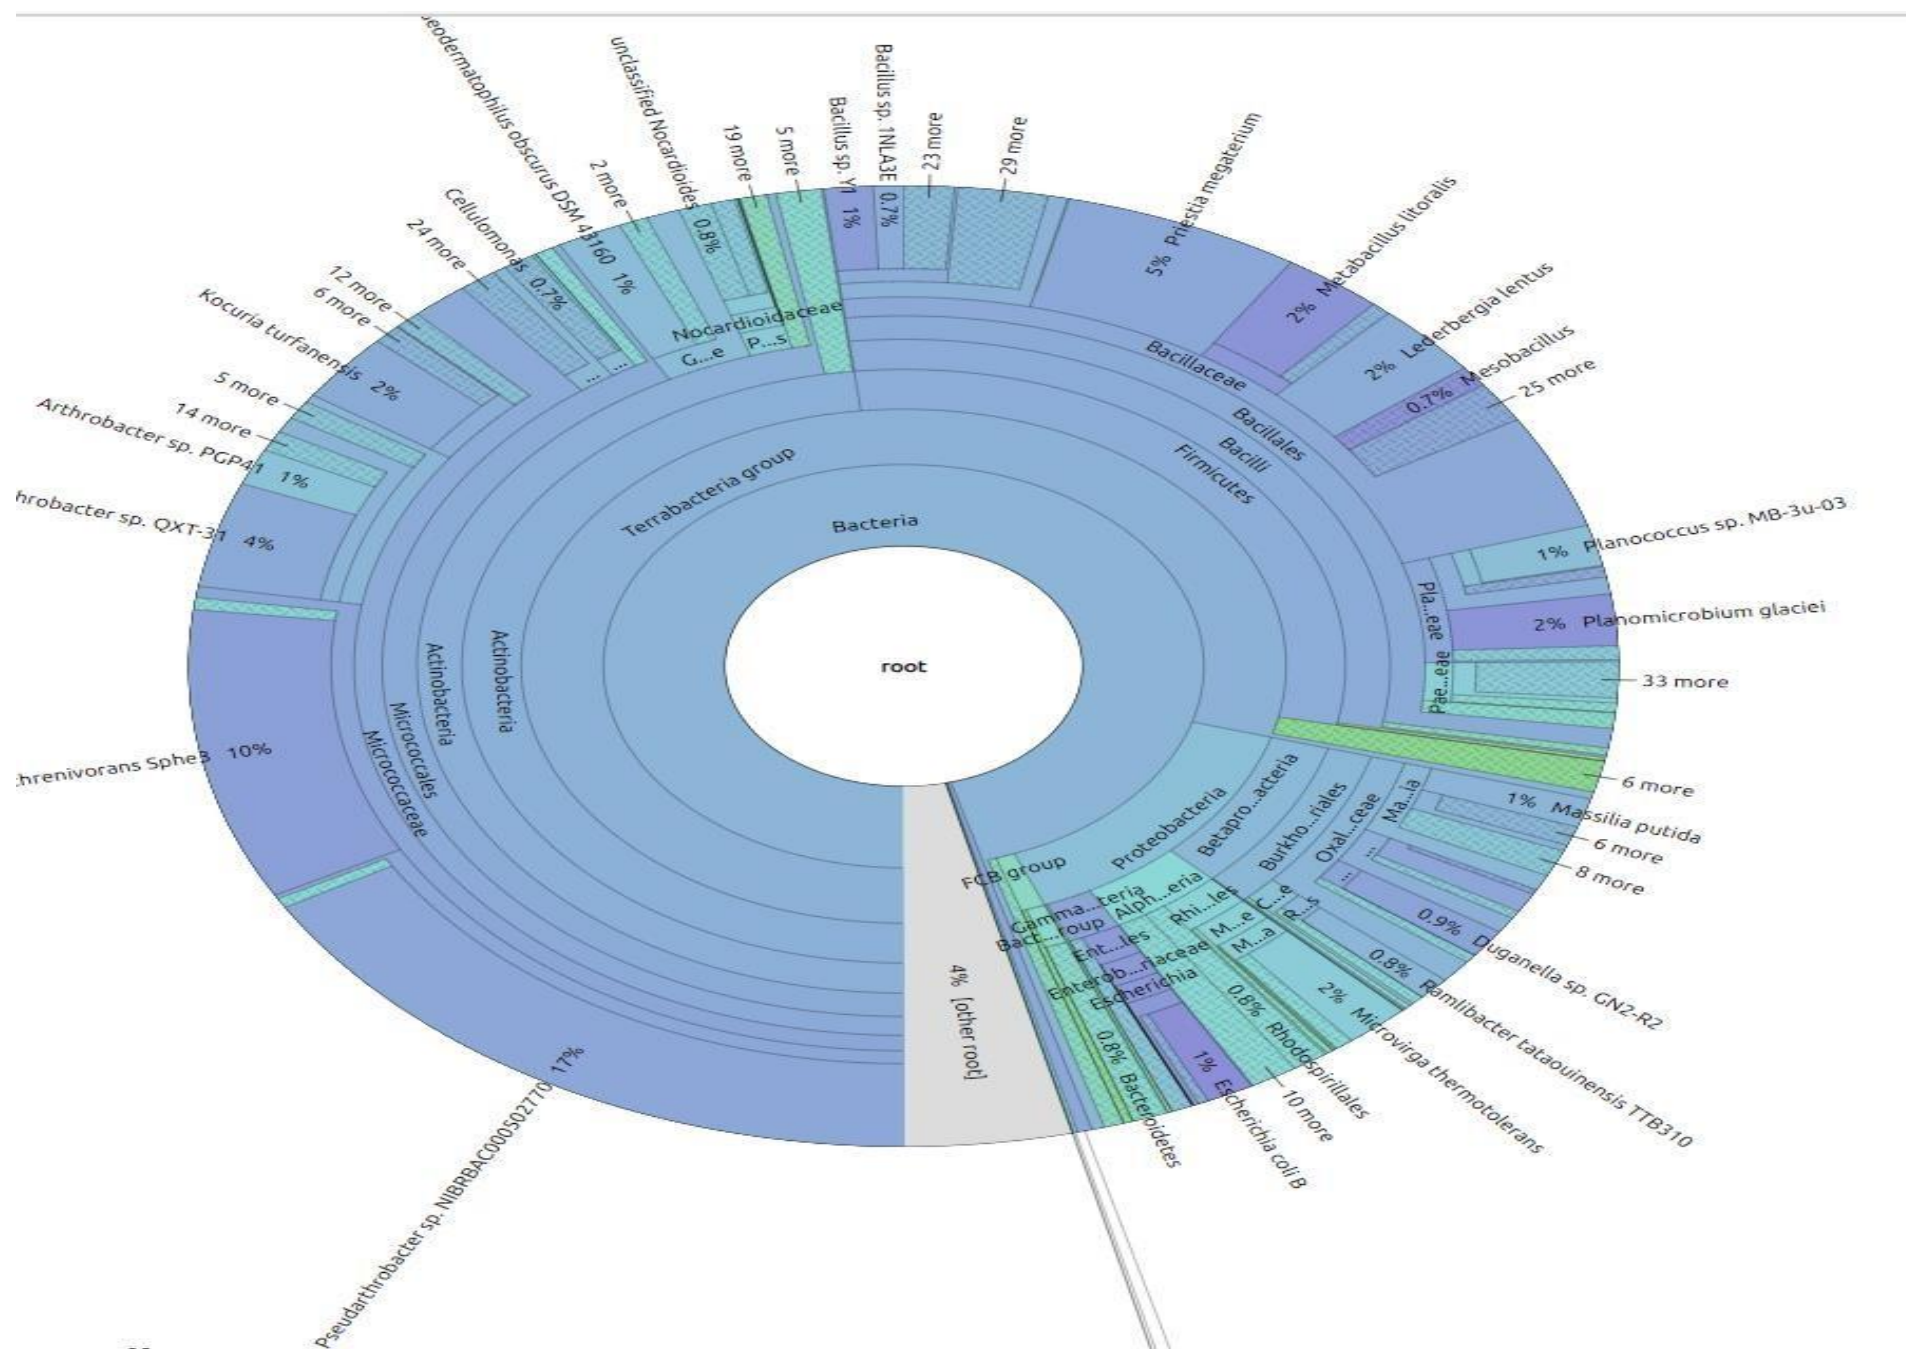

**Figure S1.** Metagenomics analysis identifying the microbial diversity and their abundance

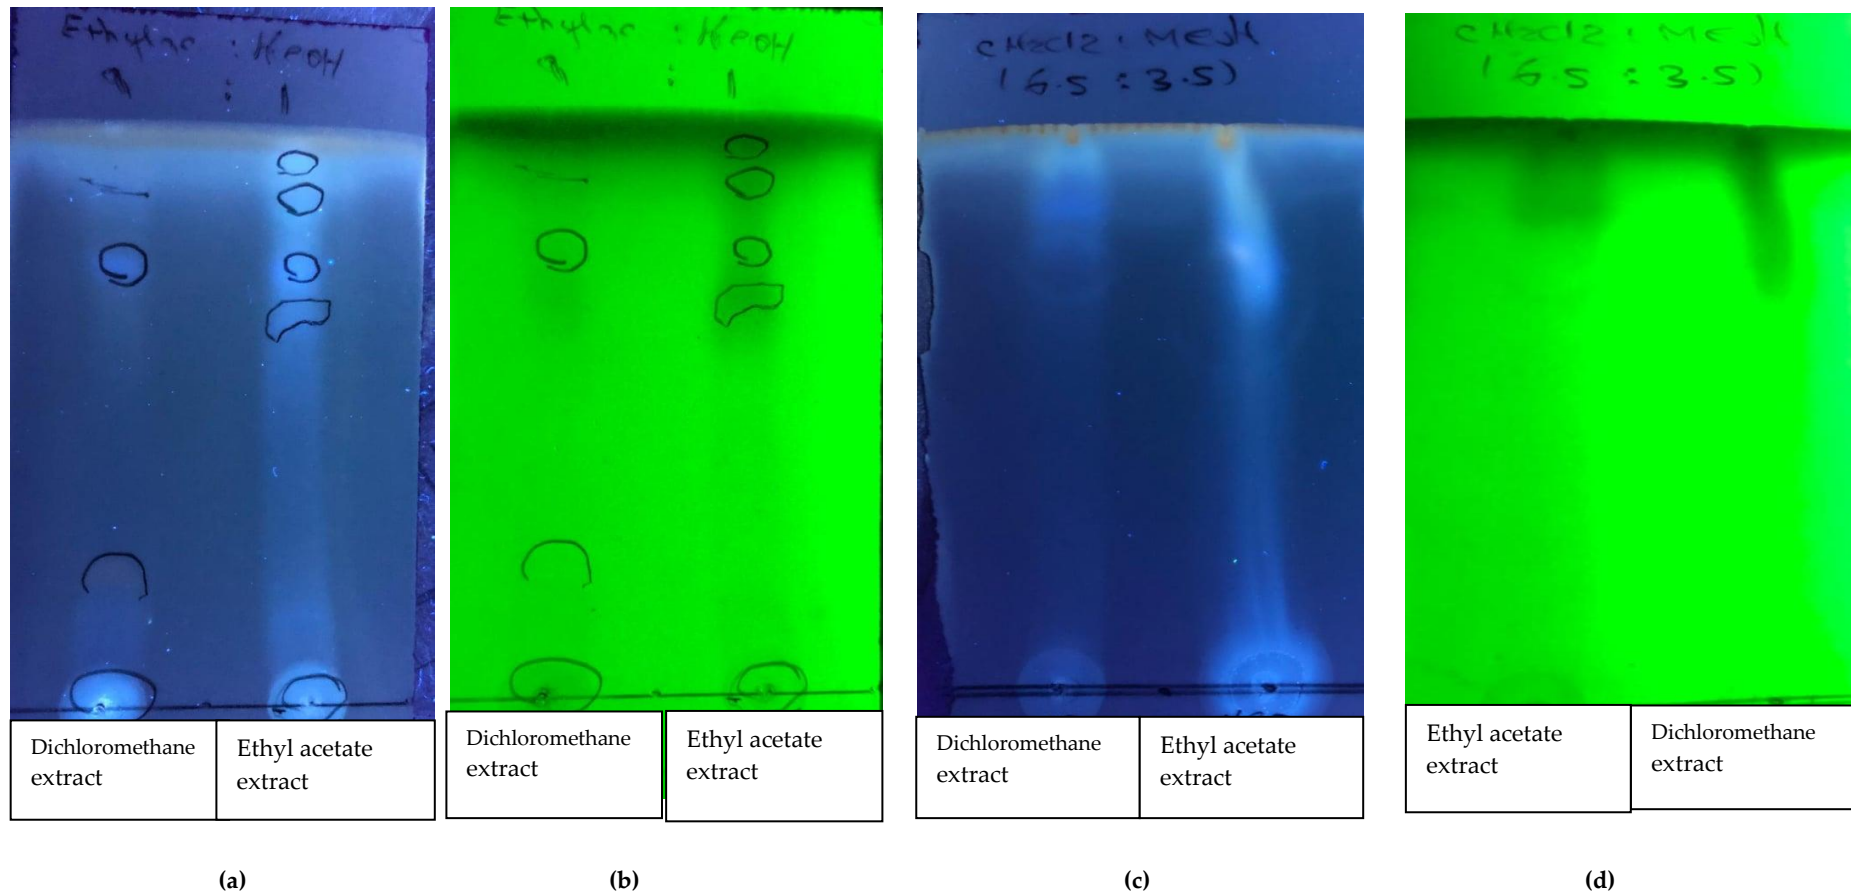

**Figure S2.** TLCs of Dichloromethane extract and Ethyl acetate extracts in different mobile phases observed under UV lamp at 365 nm (fluorescence) and 254 nm (absorbance). (a) & (b) ethyl acetate : Methanol (9:1); (c) & (d) Dichloromethane : Methanol (6.5: 3.5)
